# Supplementary material for: Metabolic regulations of a decoction of Hedyotis diffusa in acute liver injury of mouse models
Source: Chin Med. 2017 Dec 20;12:35. doi: 10.1186/s13020-017-0159-4 (PMC5738817; doi:10.1186/s13020-017-0159-4)
Supplement: Supplementary file 2 — Additional file 2. The up-regulated and down-regulated metabolites in different categories among control, LPS/GALN group and LPS/GALN + HD group. [file 13020_2017_159_MOESM2_ESM.xlsx]

## Sheet: Sheet1
Additional Table. The up-regulated and down-regulated metabolites in different categories among control, LPS/GALN group and LPS/GALN+HD group.
	Amino acids				Amino acids
	up-regulated	down-regulated			up-regulated	down-regulated
LPS/GALN group VS Control	Kynurenine	Glutamine		LPS/GALN+HD group VS Control	Citrulline	L-Valine
	L-Leucine	Glycine			Glutamine
	Tryptophan	L-Serine			L-Alanine
	N-(trifluoroacetyl)glycine	Proline			L-Serine
	Carbohydrates				N-(trifluoroacetyl)glycine
	up-regulated	down-regulated			Carbohydrates
	2-Hydroxyvaleric acid	D-Glucose	Phosphoric acid		up-regulated	down-regulated
	3-Deoxytetronic acid	D-Ribose	Xylitol		2-Hydroxyvaleric acid	D-Glucose	Mannose
	3-Hydroxybutyric acid	Ethanolamine	Xylose		3-Hydroxybutyric acid	Ethanolamine	Pinitol
	Fumaric acid	Fructose	α-Ketoglutaric acid		Malonic acid	Fructose	Urea
	Glycolic acid	glutathione			Myo-Inositol	Glycerol-3-phosphate	Xylitol
	Lactic acid	Glycerol-3-phosphate			Succinic acid	Lactic acid
	Malonic acid	Isocitrate			Lipids
	N-Acetyl glucosamine	Mannose			up-regulated		down-regulated
	Succinic acid	Myo-Inositol			10,12,14-Nonacosatriynoic acid	Monolinolein	Tetradecanoic acid
	Lipids				2-Monostearin	Oleanitrile	Ethanedioic acid
	up-regulated		down-regulated		Arachidonic acid	Stearic acid	Palmitelaidic acid
	Oleanitrile	Hexadecandioic acid	Palmitelaidic acid		Cholesterol	α-glyceryl myristate
	10,12,14-Nonacosatriynoic acid	Linoleic acid	Tetradecanoic acid		Docosahexaenoic Acid	α-Glyceryl stearate
	11-Eicosenoic acid	Methyl 10-octadecenoate			Eicosanoic acid	α-Linolenic acid
	2-Monostearin	Monolinolein			Hexadecandioic acid	α-Monopalmitin
	3,5-Dimethylphenyl isothiocyanate	Oleic Acid			Methyl 10-octadecenoate	Linoleic acid
	Arachidonic acid	Palmitic acid
	Cholesterol	Stearic acid			Nucleitides
	Docosahexaenoic Acid	α-glyceryl myristate			up-regulated	down-regulated
	Eicosanoic acid	α-Glyceryl stearate				Adenosine
	Ethanedioic acid	α-Linolenic acid
		α-Monopalmitin
	Nucleitides
	up-regulated	down-regulated
		Adenosine
